# Supplementary material
Source: publisher figshare collection journal article supplement (https://sage.figshare.com/ndownloader/files/12370799)
Supplement: Supplementary file 2 [file 12370799]

# Dyadic MID Codebook—Version 3.0<sup>1</sup>

## May 24, 2018

Zeev Maoz, Paul L. Johnson, Aaron Shreve, Fiona Ogunkoya, Jasper Kaplan  
Department of Political Science  
University of California, Davis  
Davis, CA 95616  
[zmaoz@ucdavis.edu](mailto:zmaoz@ucdavis.edu)

### 1. Introduction

This is an entirely modified, corrected, and updated version of the dyadic Militarized Interstate Disputes (MID) dataset version 2.0. The new dataset includes several important modifications compared to the previous version. These include the following:

1. *It is now a directed dyadic dataset.* Each MID is listed twice: once with sides A and B (here listed as STATEA and STATEB, respectively) being the same as in the MID 4.0 dataset ([www.correlatesofwar.org](http://www.correlatesofwar.org)), and once with the states reversed. Of course all variables that pertain to state A in the original MID dataset are modified when dyad AB becomes dyad BA (for example, if the role of STATEA is primary initiator in the original MID dataset) and dyad AB becomes dyad BA, then the role of state B in this reversed order will still be that of primary initiator; likewise if state A won the MID in the original dataset, then when the dyad becomes BA state B will now be designated as winner).
2. *Each MID has a record for every dyad year over which it extended.* If a MID had two states on side A and three states on side B and it lasted for three years (involving all participants), then it will have  $(2 \times 3)$  dyads  $\times$  3 years = 18 records. The DURINDX variable will index the year for each dyad.
3. *Many changes in the MID data are due to a change in the coding of dyadic war cases.* As discussed below, we have re-defined war outbreak and war termination in a dyadic context. A dyadic war breaks out when the first battle takes place between the dyad members such that it satisfies the state participation rule of the COW data. Likewise, the end date of a dyadic war is the end date of the last battle between the armed forces of the dyad members.

---

<sup>1</sup> **Acknowledgements.** This dataset builds on the MID 4 project of the Correlates of War Project. The MID 4 project was conducted at the Pennsylvania State University under the directorship of Professor Glenn Palmer. Key contributors to the MID 4 project include Vito D'Orazio, Michael Kenwick, and Matthew Lane. During the coding process of the dyadic MID project, we have routinely consulted the Penn State team, and received their generous help and advice. We are indebted to Glenn, Vito, Mike, and Matt for their support of our project. We are also indebted to the Alabama team: Douglas Gibler, Erin Little, and Steve Miller, for checking of the MID 3.0 dataset and making many important change proposals. Any errors of omission or commission are the responsibility of Zeev Maoz.

2. Citation: Please cite. Zeev Maoz, Paul L. Johnson, Jasper Kaplan, Fiona Ogunkoya, and Aaron Shreve 2019. The Dyadic Militarized Interstate Disputes (MIDs) Dataset Version 3.0: Logic, Characteristics, and Comparisons to Alternative Datasets, *Journal of Conflict Resolution* (forthcoming).

4. *The dataset was cleaned for some errors.* A number of users (as well as our team), pointed out some errors in the dataset. We have gone through those as well as other inconsistencies and cleaned the data. This does not mean there are no errors; we encourage users to send us any comments they have.
5. *It is updated up to 2010.* Following the release of MID 4.0, we have updated the dataset to the same time-span. Since it is a dyadic MID it may have broken several existing MIDs into new MIDs. Therefore we have a variable linking each of our MIDs to the MID 4.0 dispute number.
6. *It is modified to include proposed changes in the original MID 4.0 dataset.* These changes were proposed by a group of researchers at the University of Alabama, including Douglas Gibler, Erin Little, and Steven Miller. These changes were checked and approved by the MID team at Penn State University (including Glenn Palmer and Mike Kenwick). We specify for each record whether it has been changed from the previous version, and the type of change made.

As was the case with previous dyadic MID versions, this version builds almost entirely on the MID 4.0 dataset. When coding the dyadic MIDs, we made every effort to maintain consistency with the MID coding rules. However, there are a few differences between the two dataset. Almost all of these differences are due to the conversion of multilateral MIDs into dyadic MIDs. We document all of these cases in the MIDCOMMENTS file.

Following is the variable list and origin of the variables. MID4.2 is the original value of the variable in the MID 4.01 version; DYDMID3.0 means that this variable has been changed in the Dyadic MID 3.0 File. MID codebooks are available at: [www.correlatesofwar.org](http://www.correlatesofwar.org).

*Problems.* There are quite a few problems in some of the variables and disputes that we were unable to resolve at the present time. I enclose a file of the problems we detected. This file [Problems.xls](#) lists the disputes with their associated problems. There are numerous other problems we have probably not detected and we encourage you to send us any observations and critiques you have or any errors you detect in the dataset. In addition, if anyone has any information (preferably the original code sheets) for the disputes listed in the **PROBLEMS.XLS** file, please send us mail.

Final word of caution. As with any kind of dataset, and given the historical and geopolitical scope of the MID dataset, problems, errors, omissions, and other queries are bound to exist. Data development is an interactive process. We encourage users of this dataset to: (a) look and feel the data, (b) examine them critically, (c) use with caution, and (d) report any issues and problems that they find. We—at our end—promise to look at these things and fix the data if necessary. As always, we are committed to transparency of data development and freedom of use of these data.

### **Important Changes in War Coding.**

An interstate war is defined as a series of sustained battles between the armed forces of two or more states that results in a total of 1,000 battle-deaths. For a state to be considered a participant in war it has to meet one of two criteria.

0. It must suffer at least 100 battle-deaths.

1. It must deploy at least 1,000 troops in battle-related activities.

The original COW datasets (Singer and Small 1972; Small and Singer 1982; Sarkees and Wayman 2007), however, employed rather ad hoc decisions about start and end dates of wars. In many of these cases, wars are started when the first battle breaks out, and war end when battles end. However, in quite a few cases, wars start with a declaration of war, and end with some form of treaty (cease-fire, peace treaty). The number of cases where start and end date criteria are inconsistent is quite substantial. This is true even with the general war datasets that include multilateral wars, and the participant datasets. We provide several examples in Maoz *et al* (2017).

In the current version of the dyadic MID dataset, we decided to employ consistent coding rules for war start and end dates. These rules are particularly germane to dyadic engagements. Accordingly, we define a dyadic war as a series of battles between the armed forces of *two* states (*that is battles in which the armed forces of these two states directly confront each other*) that result in a total of 1,000 or battle deaths across both states. So, a dyadic war must satisfy the dyadic intensity and lethality criteria for the dyad. We define, however, the start and end dates of a dyadic war as follows:

1. A dyadic war starts on the first day of the first battle in which both states meet the minimum state participation criterion.
2. A dyadic war ends on the last day of the last battle in which both states meet the minimum state participation criterion.

Note that declarations of war are MID codable incidents but they are not wars. Likewise, a peace treaty, or a cease-fire agreement may take place long after hostilities have ended. Consider the following example.

In disno #258 (dyindex #258.016) we have a U.S.-Germany conflict. The MID starts with a declaration of war by Germany on the U.S. on December 11, 1941. This is the only militarized incident between these states in 1941. In 1942, there are several naval clashes between these two states, but none of which meets the war participation criteria. The first battle between the U.S. and German troops takes place in the Tunisian campaign on February 19, 1943 (see all wars report with sources therein). So in this case, the MID is listed as having a declaration of war in 1941, clash(es) in 1942, and war in 1943-45. This example illustrates the way we treated wars in the DYMID 3.0 dataset.

| Variable | Variable Label                      | Version   | Value Labels | Comments                                                                                                                                                                                |
|----------|-------------------------------------|-----------|--------------|-----------------------------------------------------------------------------------------------------------------------------------------------------------------------------------------|
|          |                                     |           |              |                                                                                                                                                                                         |
| DISNO    | Dispute Number                      | MID4.2    | —            |                                                                                                                                                                                         |
|          |                                     |           |              |                                                                                                                                                                                         |
| STATEA   | COW Number of state A in dyad       | MID4.2    | —            |                                                                                                                                                                                         |
|          |                                     |           |              |                                                                                                                                                                                         |
| NAMEA    | Abbreviated name of state A in dyad | MID4.2    | —            |                                                                                                                                                                                         |
|          |                                     |           |              |                                                                                                                                                                                         |
| STATEB   | COW Number of state B in dyad       | MID4.2    | —            |                                                                                                                                                                                         |
|          |                                     |           |              |                                                                                                                                                                                         |
| NAMEB    | Abbreviated name of state B in dyad | MID4.2    | —            |                                                                                                                                                                                         |
|          |                                     |           |              |                                                                                                                                                                                         |
| STRTDAY  | Start day of dyadic dispute         | DYDMID3.0 | —            | Adjusted for dyad. Start day indicates the actual start day of the dyadic dispute. <b>When precise start day is missing (-9 in MID4.2 files), I assigned the first day of the month</b> |
| STRTMNTH | Start month of dyadic dispute       | DYDMID3.0 | —            | Same as above (no missing values)                                                                                                                                                       |
|          |                                     |           |              |                                                                                                                                                                                         |
| STRTYR   | Start year of dyadic dispute        | DYDMID3.0 | —            | Same as above (no missing values)                                                                                                                                                       |
|          |                                     |           |              |                                                                                                                                                                                         |
| YEAR     | Year of dispute                     | DYDMID3.0 | —            | Year dispute is underway. Cumulates for multiyear disputes (i.e., a MID that started                                                                                                    |

| Variable | Variable Label            | Version   | Value Labels                                                                                                                                                                              | Comments                                                                                                                                                                                                                           |
|----------|---------------------------|-----------|-------------------------------------------------------------------------------------------------------------------------------------------------------------------------------------------|------------------------------------------------------------------------------------------------------------------------------------------------------------------------------------------------------------------------------------|
|          |                           |           |                                                                                                                                                                                           | in 1821 and ended in 1823 contains three records, one for 1821, one for 1822, and one for 1823), start dates and end dates are the same for all three records of the MID                                                           |
| ENDDAY   | End day of MID            | DYDMID3.0 | —                                                                                                                                                                                         | Adjusted for dyad. End day indicates the actual end day of the dyadic dispute. When precise start day is missing (-9 in MID4.2 files), I assigned the last day of the month                                                        |
| ENDMNTH  | End month of MID          | DYDMID3.0 | —                                                                                                                                                                                         | Same as above (no missing values)                                                                                                                                                                                                  |
| ENDYEAR  | End year of MID           | DYDMID3.0 | —                                                                                                                                                                                         | Same as above (no missing values)                                                                                                                                                                                                  |
| OUTCOME  | Outcome of dyadic dispute | DYDMID3.0 | 1. Victory for State A<br>2. Victory for state B<br>3. Yield by State A<br>4. Yield by State B<br>5. Stalemate<br>6. Compromise<br>7. Released (for seizures)<br>8. Unclear<br>-9 Missing | Changed to reflect the actual dyadic outcome. Listed only for last year of dispute.<br><b>Note:</b> Category 9 in MID 4.01 (Join Interstate War) does not exist in a dyadic context. The outcome is the outcome of the dyadic war. |
|          |                           |           |                                                                                                                                                                                           |                                                                                                                                                                                                                                    |

| Variable | Variable Label                                          | Version   | Value Labels                                                                                                                                                                                                                                                                                                                                                                                         | Comments                                                                                                            |
|----------|---------------------------------------------------------|-----------|------------------------------------------------------------------------------------------------------------------------------------------------------------------------------------------------------------------------------------------------------------------------------------------------------------------------------------------------------------------------------------------------------|---------------------------------------------------------------------------------------------------------------------|
| SETTLMNT | Settlement type of dyadic dispute                       | DYDMID3.0 | 1. Negotiated<br>2. Imposed<br>3. None<br>4. Unclear<br>-9 Missing                                                                                                                                                                                                                                                                                                                                   | Changed to reflect the actual dyadic settlement. Listed only for last year of dispute.                              |
|          |                                                         |           |                                                                                                                                                                                                                                                                                                                                                                                                      |                                                                                                                     |
| FATLEV   | Fatality level of dyadic dispute                        | DYDMID3.0 | 0 None<br>1 1-25 deaths<br>2 26-100<br>3 101-250<br>4 251-500<br>5 501-999<br>6 1,000+<br>-9 Missing (known fat.)                                                                                                                                                                                                                                                                                    | Changed to reflect the actual fatality level. Listed only for last year of dispute. Use with caution.               |
|          |                                                         |           |                                                                                                                                                                                                                                                                                                                                                                                                      |                                                                                                                     |
| HIGHACT  | Highest military confrontation action in dyadic dispute | DYDMID3.0 | 1. None (1)<br>2. Threat to use force (2)<br>3. Threat to blockade (2)<br>4. Threat to occupy terr. (2)<br>5. Threat to declare war (2)<br>6. Threat to join war (2)<br>7. Show of troops (3)<br>8. Show of ships (3)<br>9. Show of planes (3)<br>10. Alert (3)<br>12. Mobilization (3)<br>13. Fortify border (3)<br>14. Border violation (4)<br>15. Blockade (4)<br>16. Occupation of territory (4) | Reflects highest action initiated by members of dyad toward each other. Number in parenthesis is level of hostility |

| Variable | Variable Label                               | Version | Value Labels                                                                                                                                                             | Comments                                                                                                                                                                                                                                                                              |
|----------|----------------------------------------------|---------|--------------------------------------------------------------------------------------------------------------------------------------------------------------------------|---------------------------------------------------------------------------------------------------------------------------------------------------------------------------------------------------------------------------------------------------------------------------------------|
|          |                                              |         | 17. Seizure (4)<br>18. Clash (4)<br>19. Raid (4)<br>20. Declaration of war (4)<br>22. Begin interstate war (5)<br>23. Join interstate war (5)<br>24. Use CBR Weapons (5) |                                                                                                                                                                                                                                                                                       |
|          |                                              |         |                                                                                                                                                                          |                                                                                                                                                                                                                                                                                       |
| HIHOST   | Highest level of hostility in dyadic dispute | MID4.2  | 1. None<br>2. Threat to use force<br>3. Display of force<br>4. Use of force<br>5. Interstate war                                                                         |                                                                                                                                                                                                                                                                                       |
|          |                                              |         |                                                                                                                                                                          |                                                                                                                                                                                                                                                                                       |
| RECIP    | Reciprocated dispute?                        | MID4.2  | 1: Yes<br>0: No                                                                                                                                                          | We use a different definition of this variable than the MID 4.0 dataset. A reciprocated MID is one in which the initiator cannot be identified (e.g., first incident is a clash without a clear initiator). Roles are assigned randomly. When RECIP =1 use rolea and roleb carefully. |
|          |                                              |         |                                                                                                                                                                          |                                                                                                                                                                                                                                                                                       |
| NOINIT   | Number of states on Side A                   | MID4.2  | —                                                                                                                                                                        | Total no of initiators in MID                                                                                                                                                                                                                                                         |
|          |                                              |         |                                                                                                                                                                          |                                                                                                                                                                                                                                                                                       |
| NOTARG   | Number of states on side B                   | MID4.2  | —                                                                                                                                                                        | Total no. of targets in MID                                                                                                                                                                                                                                                           |
|          |                                              |         |                                                                                                                                                                          |                                                                                                                                                                                                                                                                                       |
| SIDEAA   | State A on initiator's side?                 | MID4.2  | 1: Yes                                                                                                                                                                   | 1=side that initiated MID;                                                                                                                                                                                                                                                            |

| Variable | Variable Label                                                  | Version   | Value Labels                                                                                     | Comments                                                                                                     |
|----------|-----------------------------------------------------------------|-----------|--------------------------------------------------------------------------------------------------|--------------------------------------------------------------------------------------------------------------|
|          |                                                                 |           | 0: No                                                                                            | adjusted for dyad                                                                                            |
|          |                                                                 |           |                                                                                                  |                                                                                                              |
| REVSTAT  | State A revisionist?                                            | MID4.2    | 1: Yes<br>0: No                                                                                  | Adjusted for dyad                                                                                            |
|          |                                                                 |           |                                                                                                  |                                                                                                              |
| REVTYPEA | Type of revision sought by state A                              | MID4.2    | 0. Not applicable<br>1. Territory<br>2. Policy<br>3. Regime/government<br>4. Other<br>-9 Missing | Adjusted for dyad                                                                                            |
|          |                                                                 |           |                                                                                                  |                                                                                                              |
| FATLEVA  | Level of fatality incurred by state A in dyadic dispute         | MID4.2    | Same as FATLEV for state A                                                                       | Reflects actual dyadic dispute. Missing data. Use with caution. Listed only for last year of dyadic dispute. |
|          |                                                                 |           |                                                                                                  |                                                                                                              |
| HIGHMCAA | Highest MCA initiated by state A                                | DYDMID3.0 | Same as HIGHACT for state A                                                                      | Reflects actual highest-level action initiated by state A towards state B in dyadic dispute.                 |
|          |                                                                 |           |                                                                                                  |                                                                                                              |
| HIGHOSTA | Highest level of hostility reached by state A in dyadic dispute | MID4.2    | Same as HIHOST for state A                                                                       | Reflects actual HIHOST initiated by state A toward state B in dyadic dispute.                                |
|          |                                                                 |           |                                                                                                  |                                                                                                              |
| ORIGNATA | State A participated in the first incident of the MID           | MID4.2    | 1: Yes<br>0: No                                                                                  | 1=State A either primary initiator or primary target;<br>0=state A joiner (on initiator or target side)      |



| Variable | Variable Label                                                  | Version   | Value Labels                                                                                     | Comments                           |
|----------|-----------------------------------------------------------------|-----------|--------------------------------------------------------------------------------------------------|------------------------------------|
| SIDEAB   | State B on initiator's side?                                    | MID4.2    | 1: Yes<br>0: No                                                                                  |                                    |
| REVSTATB | State B revisionist?                                            | MID4.2    | 1: Yes<br>0: No                                                                                  |                                    |
| REVTYPEB | Type of revision sought by state B                              | MID4.2    |                                                                                                  | Same as REVTYPE for state A        |
| FATLEVB  | Level of fatality incurred by state B in dyadic dispute         | MID4.2    | Same as FATLEVA                                                                                  | Same as FATLEV for state A         |
| HIGHMCAB | Highest MCA initiated by state B                                | DYDMID3.0 |                                                                                                  | Same as HIGHMCA for state B        |
| HIGHOSTB | Highest level of hostility reached by state B in dyadic dispute | DYDMID3.0 |                                                                                                  | Same as HIGHOST for state B        |
| ORIGNATB | State B originator (initiator) of dispute?                      | MID4.2    | -1: Yes<br>0: No                                                                                 |                                    |
| ROLEA    | Role of state A in dyadic dispute                               | DYDMID3.0 | 1=Primary Initiator<br>2=Joiner on initiator side<br>3=Primary target<br>4=Joiner on target side | See problems file in this package. |
| ROLEB    | Role of state B in dyadic dispute                               | DYDMID3.0 | 1=Primary Initiator<br>2=Joiner on initiator side<br>3=Primary target<br>4=Joiner on target side |                                    |

| Variable | Variable Label                  | Version   | Value Labels                                             | Comments                                                                                                                                                                                                                                                                                                                                      |
|----------|---------------------------------|-----------|----------------------------------------------------------|-----------------------------------------------------------------------------------------------------------------------------------------------------------------------------------------------------------------------------------------------------------------------------------------------------------------------------------------------|
| WAR      | Is this dispute a COW war dyad  | DYDMID3.0 | 1: Yes<br>0: No                                          | Adjusted to reflect actual warring dyads in multilateral disputes.<br><b>Note.</b> A multiyear MID that escalates into war after the MID started can be marked below the war level for the year/s before the war outbreak, and if the MID continued after the war ended, it will be marked as zero for years of MID after the end of the war. |
| DURINDX  | Duration index                  | DYDMID3.0 | 1. First year of dispute<br>2. Second year of dispute... | Those who want to use only dispute outbreaks should select durindx=1                                                                                                                                                                                                                                                                          |
| DURATION | No. of dispute days during year | DYDMID3.0 |                                                          | For disputes crossing a calendar year, each record reflects no. of dispute days during the present calendar year.                                                                                                                                                                                                                             |
| CUMDURAT |                                 | DYDMID2.0 |                                                          | Cumulative number of days from the start date of the MID to the present (either the end of the year of MIDs crossing over to next year or end date—if MID ends in present year)                                                                                                                                                               |
|          |                                 |           |                                                          |                                                                                                                                                                                                                                                                                                                                               |

| Variable  | Variable Label                    | Version | Value Labels                                                                                                                                                                                                                                                                                                                                                                                                                                                                                                                                                                                                                  | Comments                                                                                 |
|-----------|-----------------------------------|---------|-------------------------------------------------------------------------------------------------------------------------------------------------------------------------------------------------------------------------------------------------------------------------------------------------------------------------------------------------------------------------------------------------------------------------------------------------------------------------------------------------------------------------------------------------------------------------------------------------------------------------------|------------------------------------------------------------------------------------------|
| MID3Hiact | MID4.2 Highest action for dyad    | MID4.2  | 0. No militarized action (1)<br>1. Threat to use force (2)<br>2. Threat to blockade (2)<br>3. Threat to occupy terr. (2)<br>4. Threat to declare war (2)<br>5. Threat to use CBR weapons (2)<br>6. Threat to join war (2)<br>7. Show of force (3)<br>8. Alert (3)<br>9. Nuclear alert (3)<br>10. Mobilization (3)<br>11. Fortify border (3)<br>12. Border violation (4)<br>13. Blockade (4)<br>14. Occupation of territory (4)<br>15. Seizure (4)<br>16. Attack (4)<br>17. Clash (4)<br>18. Declaration of war (4)<br>19. Use of CBR weapons (4)<br>20. Begin interstate war (5)<br>21. Join interstate war (5)<br>-9 Missing | Adjusted to reflect highest action in MID using MID4.2 coding of militarized actions     |
|           |                                   |         |                                                                                                                                                                                                                                                                                                                                                                                                                                                                                                                                                                                                                               |                                                                                          |
| MID3HIA   | MID4.2 Highest action for state A | MID4.2  |                                                                                                                                                                                                                                                                                                                                                                                                                                                                                                                                                                                                                               | Adjusted to reflect highest action of state A using MID4.2 coding of militarized actions |
|           |                                   |         |                                                                                                                                                                                                                                                                                                                                                                                                                                                                                                                                                                                                                               |                                                                                          |
| MID3HIB   | MID4.2 Highest action for State B | MID4.2  | See MID4.2 (MID level) codebook                                                                                                                                                                                                                                                                                                                                                                                                                                                                                                                                                                                               | Adjusted to reflect highest action of state B using MID4.2                               |

| Variable | Variable Label                               | Version   | Value Labels                                                                                                                                                                                         | Comments                                                                                                                                                                                                                                                                                                                                                |
|----------|----------------------------------------------|-----------|------------------------------------------------------------------------------------------------------------------------------------------------------------------------------------------------------|---------------------------------------------------------------------------------------------------------------------------------------------------------------------------------------------------------------------------------------------------------------------------------------------------------------------------------------------------------|
|          |                                              |           |                                                                                                                                                                                                      | coding of militarized actions                                                                                                                                                                                                                                                                                                                           |
| DISNO4   | MID 4 Dispute Number                         | MID4.2    |                                                                                                                                                                                                      |                                                                                                                                                                                                                                                                                                                                                         |
| ONGO2010 | Ongoing MID in 2010                          | MID4.2    | <ol style="list-style-type: none"> <li>1. MID ongoing at the end of 2010</li> <li>2. MID terminated by 12/31/2010</li> </ol>                                                                         |                                                                                                                                                                                                                                                                                                                                                         |
| NEW      | New dyadic MID                               | DYDMID3.0 | <ol style="list-style-type: none"> <li>3. New dyadic MID</li> <li>4. Existed in DYDMID 2.0</li> </ol>                                                                                                | A new MID that was added to the current version                                                                                                                                                                                                                                                                                                         |
| CHANGE   | A change in an existing dyadic MID           | DYDMID3.0 | <ol style="list-style-type: none"> <li>0. No change from DYDMID 2.0</li> <li>1. Dyadic MID (UC Davis) change</li> <li>2. MID 4.01 (Penn State) change</li> <li>3. Alabama proposed change</li> </ol> | <ol style="list-style-type: none"> <li>1. UC Davis team research change. This may be due to conversion of a multilateral MID to a dyadic format or additional research on a MID 4.01 MID.</li> <li>2. Changes inserted by the Penn State team in the MID dataset</li> <li>3. Proposed changes by the Alabama team and approved by Penn State</li> </ol> |
| DYINDEX  | A new index number unique to each dyadic MID | DYDMID3.0 |                                                                                                                                                                                                      | All MID 4.01 cases that are strictly bilateral get the MID number (DISNO) +.001. For example, MID #100 is a bilateral MID. Therefore its DYINDEX is 100.001. In multilateral MIDs, each specific dyad gets its own ID number. For example DISNO 258 (WWII) has index numbers                                                                            |

| Variable     | Variable Label             | Version   | Value Labels                                                                                                                                                                                                                                                                                               | Comments                                                                   |
|--------------|----------------------------|-----------|------------------------------------------------------------------------------------------------------------------------------------------------------------------------------------------------------------------------------------------------------------------------------------------------------------|----------------------------------------------------------------------------|
|              |                            |           |                                                                                                                                                                                                                                                                                                            | going from 258.001 to 258.078, meaning that it includes 78 distinct dyads. |
| Change       | Change from Dyadic MID 2.1 | DYDMID3.0 | 0 = No<br>1 = Yes                                                                                                                                                                                                                                                                                          |                                                                            |
| Changetype_1 | Change from MID 4.2        | DYDMID3.0 | 0 = None<br>1 = start/end day change<br>2 = Start/end month change<br>3 = Start/end year change<br>4 = Fatality change<br>5 = Fatality A/B change<br>6 = Highact change<br>7 = Outcome change<br>8 = Revisionist state change<br>9 = Revision type change<br>10 = New Observation<br>11 = Recommended drop |                                                                            |
| Changetype_2 | Change from MID 4.2        | DYDMID3.0 |                                                                                                                                                                                                                                                                                                            | Additional Change                                                          |
